# Supplementary material
Source: PubMed Central journal article supplement (PMC2690467)
Supplement: rspb20090195s09.pdf [file rspb20090195s09.pdf]

**SUPPLEMENTARY MATERIAL: Display of wind directions for different wind speeds during the three seasons; spring, summer and autumn**

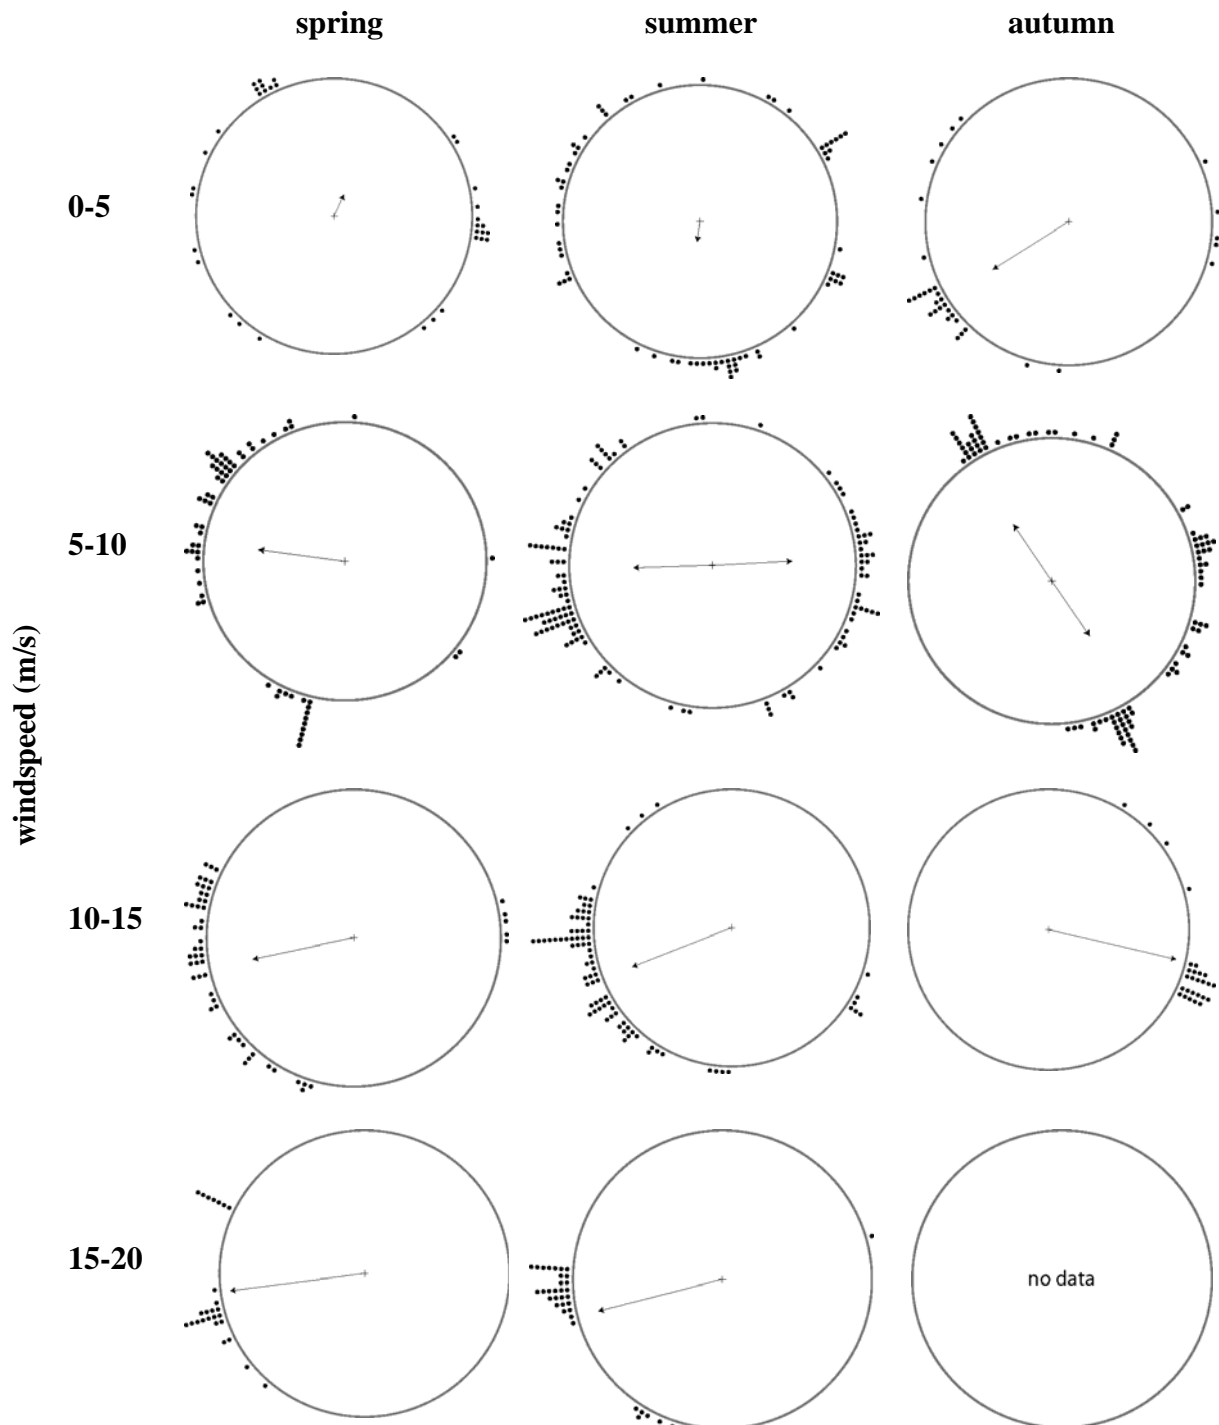

Figure 4. Plots of wind directions of different wind speed intervals for the three seasons. Each of the stacked dots represents a tracking and each stack corresponds to the group of trackings within a 2.5 degree intervals. The central vector in each sub-figure corresponds to the mean vector, where length of the vector corresponds to the 'directional strength'. The direction is expressed as from where the wind is coming. In 5-10 m/s winds of summer and autumn the winds were found to be bimodal ( $r_2$ -vector larger than  $r$ ).
